# Supplementary material
Source: PubMed Central journal article supplement (PMC4485580)

## On-line Appendix 1. Barrier Scenario Survey Questions

We are trying to find out what makes it hard for patients to take glaucoma eye drops perfectly. We will present you with eleven reasons that some glaucoma patients have said make it hard for them to take their drops perfectly. We want you to rate how important each one of these issues are to you by placing an “X” on the bar below the issue somewhere between “strongly disagree” and “strongly agree.”

### Scenario 1: Ability to take eyedrops

I have so much trouble using my eyedrops and getting them in my eye. I don't think I use the drops properly and I have no one to help me put them in.

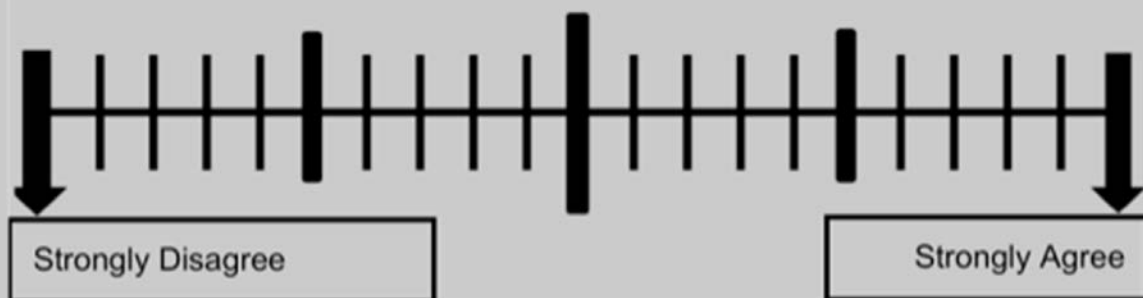

## Scenario 2: Confidence

I am not confident that I can remember to take my glaucoma drops all of the time.

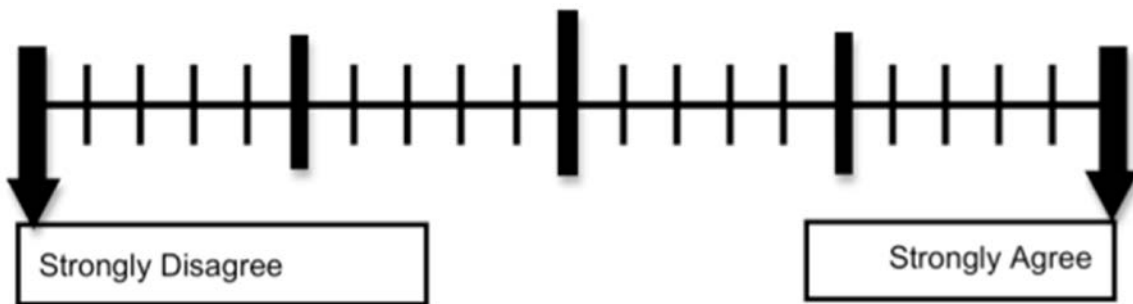

### Scenario 3: Knowledge about Glaucoma

I do not understand why it is important to take drops to treat my glaucoma. I do not feel like I have a very good understanding of how glaucoma will cause me to lose vision. If I knew more about how and why the drops work, I would be more likely to take my drops properly.

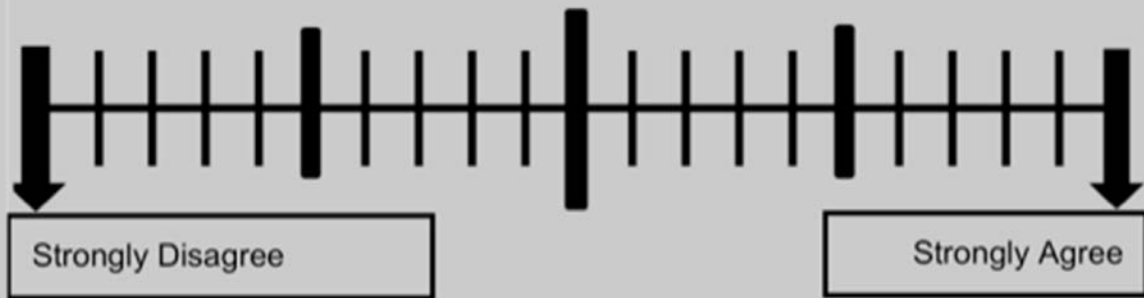

### Scenario 4: Beliefs about Glaucoma

I do not believe that glaucoma will really cause me to lose vision. My doctor tells me that I can lose vision from glaucoma, but I've had it for a while now and I can still see well. I have known other people who have had glaucoma, and they could still read and drive.

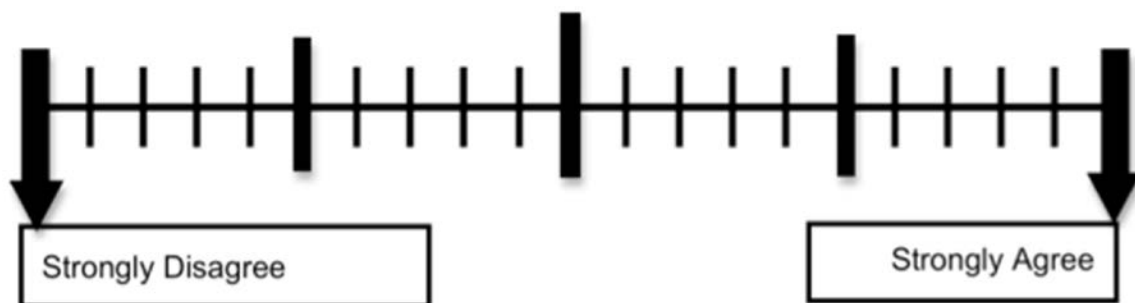

## Scenario 5: Beliefs about Glaucoma Medications

I do not think that these eye drops can prevent me from losing vision from glaucoma. Also, I took them for a while and my vision did not improve at all.

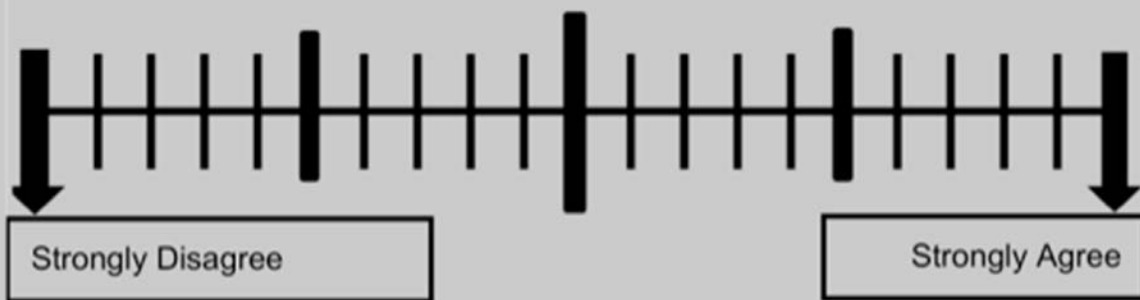

## Scenario 6: Stress

I have too much stress in my life. It makes it really hard for me to pay so much attention to taking my glaucoma drops 100% of the time.

Sometimes I feel that I just can't cope.

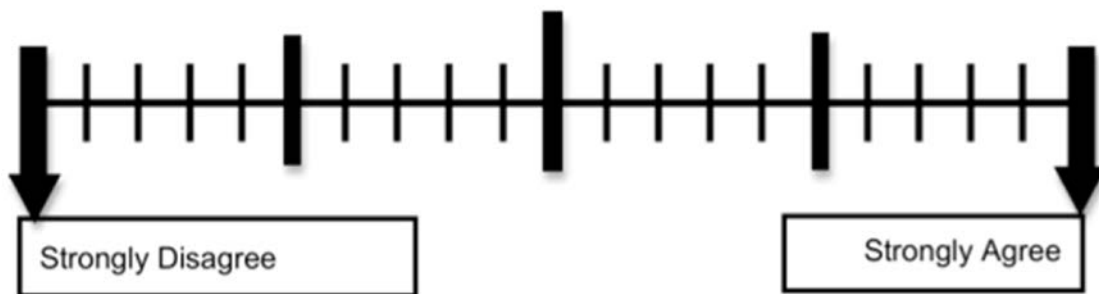

## Scenario 7: Forgetfulness

I have a really hard time remembering to take my glaucoma drops. I don't mean to, but I just forget a few of the doses. I especially have a hard time remembering at certain times in the day, like in the middle of the day when I am busy. I also have a really hard time remembering when I am out of my routine, like on the weekends.

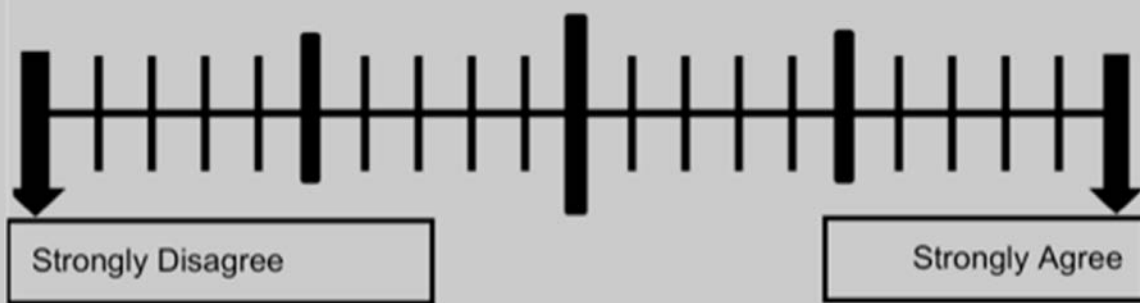

## Scenario 8: Side Effects

What makes it really hard for me to take my glaucoma drops all of the time are the side effects. I can't stand having irritated, itchy red eyes. I always feel like people are looking at me and thinking that something is wrong with my eyes because they look red.

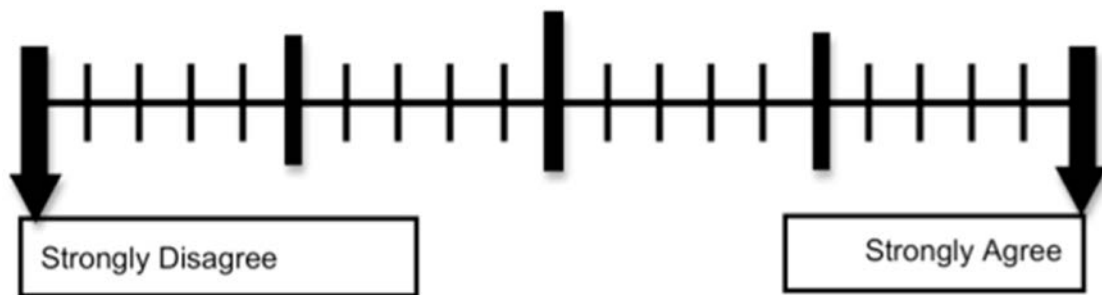



## Scenario 9: Cost

My glaucoma medications are very expensive. Sometimes I try to use a few less doses so that I can make them last longer because they cost so much money.

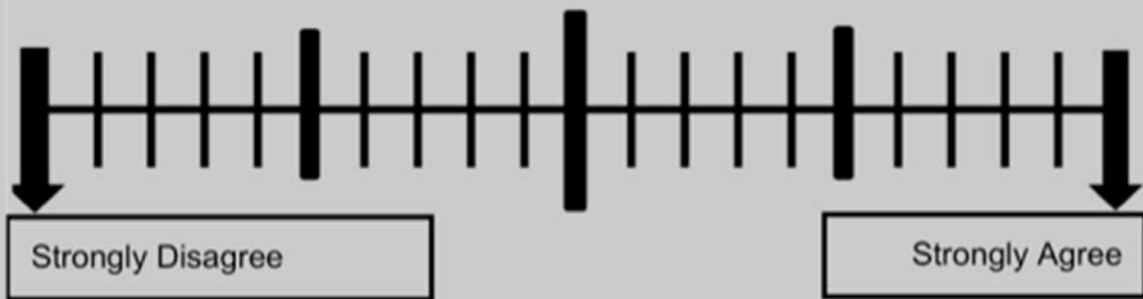

## Scenario 10: A difficult medication schedule

I have to remember to take too many different kinds of drops. I also have to remember to take them at too many different times during the day. At times, I have missed doses because I feel frustrated keeping track of my drops. If taking my medication were less complicated, I would be better at taking the right doses.

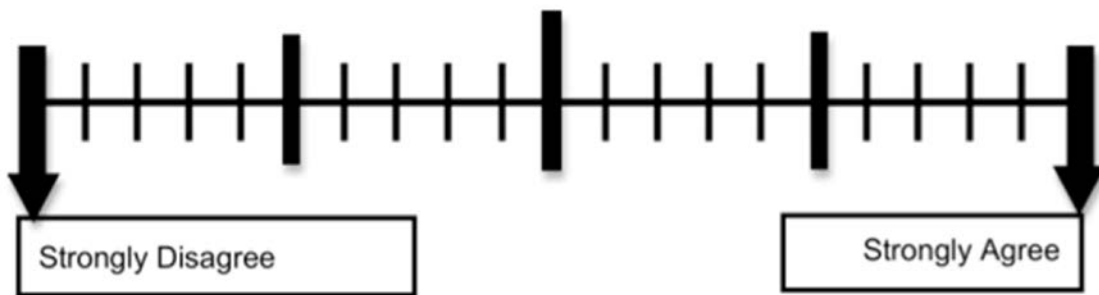

## Scenario 11: Patient-Doctor Relationship

I am not sure that my doctor has really explained all of my options for treating my glaucoma. I also worry that my doctor does not do everything he/she could for my glaucoma.

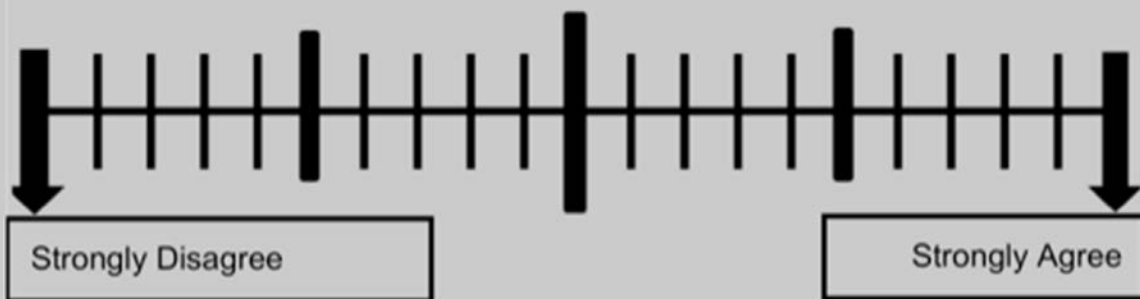

Supplement: NIHMS684525-supplement-2.pdf [file NIHMS684525-supplement-2.pdf]
